# Supplementary material for: Heterogeneity of Exhausted T Cell Subsets in Responders and Non-Responders Following Checkpoint Inhibition Therapy
Source: Research Square preprint supplement (doi:10.21203/rs.3.rs-5663382/v1), 2025-03-11
Supplement: Supplementary file 1 [file 65a441b884a63fddad4a54e8.docx]

**Tables**

**Table 1**. The key characteristics of the analyzed T cell states.

| **T Cell State** | **Characteristics** |
| --- | --- |
| TN (naïve) | Antigen-inexperienced cells that continuously circulate through  lymphatic vessels and blood, and surveil peripheral tissues |
| TSCM (Stem Cell Memory) | Possess stem cell-like properties, including self-renewal capacity and multipotency, and serve as a long-lived reservoir for memory T cells |
| TCM (Central Memory) | Primarily reside in secondary lymphoid organs and exhibit high expression of homing receptors, enabling their circulation through lymphoid tissues. Similar cytolytic capabilities as TEM but with greater IL-2 production and  proliferative potential. |
| TEM (Effector Memory) | Localized in peripheral tissues and exhibit immediate effector functions upon antigen re-encounter, providing rapid immune responses at the site of infection or inflammation |
| TEFF (Effector) | Terminally differentiated and primed to rapidly respond to antigenic stimulation, exerting effector functions such as cytokine secretion and cytotoxicity |
| TExProg1 (Progenitor 1) | Quiescent progenitor subset. Highest IFN-producers, IFN and TNF coproducers. High proliferative potential but with low ongoing cell cycle in the steady state. Little evidence of ex vivo cell death. Not present in the blood. Characterized by the following surface markers: Ly108/SLAMF6+ CD69+. Characteristic transcriptional factors include high Eomes, TCF1/TCF7, TOX. |
| TExProg2 (Progenitor 2) | Progenitor subset with circulatory potential, thus present in the blood. Preferentially expanded by PD-L1 blockade. Some proliferative potential left. Cytokine production starts to decline. Little evidence of ex vivo cell death. Shares around 40% of TExProg1 upregulated DEGs but at a lower amount. Related open-chromatin landscape to TExProg1. Characterized by the following surface markers: Ly108/SLAMF6+ CD69-. Characteristic transcriptional factors include high: TOX, int.: TCF1/TCF7. |
| TExInt (Intermediate) | Intermediate state that re-engages some effector biology, showing evidence of recent proliferation, and gradually converting to a more terminally exhausted state. Present in the blood and low cytokine production. Selectively expanded by PD-L1 blockade. Apoptotic cells were readily detectable. Characterized by surface markers Ly108/SLAMF6- CD69-. Characteristic transcriptional factors include high T-Bet, Int. TOX, low: TCF1/TCF7. |
| TexTerm (Terminal) | State of irreversible commitment. Not present in the blood and cytokine coproduction rebounds but not to the level of TExProg1. Apoptotic cells were readily detectable. Characterized by surface markers Ly108- CD69+. Characteristic transcriptional factors are high: TOX, Eomes, low: T-Bet. |
